# Supplementary material for: Applying the Yb3+ion as a simple and sensitive probe to detect phosphate-containing derivatives in aqueous solution
Source: Royal Society of Chemistry journal article supplement (doi:10.1039/b315965e), 2004-01-01
Supplement: b315965e.doc [file b315965e.doc]

# Supporting Information

1. **Data of Absorbance for the Ensemble of Yb3+-Pyrocatechol Violet-ATP**

The working curve for ATP measurement (F**igure 1s**) was plotted with the absorbance value against various concentrations of ATP (0, 10, 20, 40, 80, 160, 320μM) (**table 1s**). The average of *ε* is 6993.

Table 1s

| Conc. of ATP/μM | Absorbance | /L·mol-1·cm-1 |
| --- | --- | --- |
| 0 | 0 | 0 |
| 10 | 0.070521 | 7052 |
| 20 | 0.14022 | 7011 |
| 40 | 0.27070 | 6767 |
| 80 | 0.55825 | 6978 |
| 160 | 1.10890 | 6931 |
| 320 | 2.27270 | 7102 |

**Figure 1s**

1. **Choice of pH-range for the Measurement (Figure 2s):**

**Figure 2s** The absorbance under various pH values. These black lines represent the absorbance of pyrocatechol violet (50μM), red ones are the absorbance of [Yb2(pyrocatechol violet)](50μM pyrocatechol violet, 100μM YbCl3), and the green ones the absorbance of the ensemble when 100μM ATP was added into the solution of [Yb2 (pyrocatechol violet)](50uM pyrocatechol violet. The pH (6.0-8.5) of the buffers (10mM HEPES) was adjusted with 0.1mM NaOH and HCl.

**3. The Evidence for Suggested Structure (Figure 3s)**

**Figure 3s** Why did we conclude the scheme of color changes in the text? We got the spectrum of some acidity (pH=0.01, 3.12, 7.0, 10.34) solutuions. The above figure shows that the maximum of pyrocatechol violet will change gradually from shorter wave (444nm about) to longer wave (600nm about) with the acidity increasing. Pyrocatechol violet has two acid/base (see the scheme below). Under stronger acidity, it exists mainly in form **I**, it will change from **I** to **II** with the decrease of acidity. Here Yb3+ can play the role of acid. That is, at first , Yb3+ coordinates with **I** at position (1) and (2), this will promote the formation of **II** and its complexation. Accordingly, the maximum absorption peak of pyrocatechol violet will change from 444nm to 623nm. Moreover, in our experiment we found it is most perfect in a 1:2 molar ratio for pyrocatechol violet : Yb3+, so we deduce Yb3+ also coordinate in (3) and (4).

1. **Other anions do not affect on detection**

Figure 4s .UV/Vis spectra of the [Yb2(pyrocatechol violet)] mixture (50μM in a pH HEPES buffer solution) was added with various anions and ATP(100μ M).

1. **With Other Metal Ions**

Figure 5s Both UV/Vis spectrophotometry and naked-eyes observations showed that transition metal ions could not play the same sensor-role for the assay, and non-Yb3+ lanthanide ions did work as well as Yb3+ did (we have tested most of other ions, here we give some typical ones).

**6. Determination of the Coordination Ratio of ATP to Yb**

Figure 6s To determine the coordination ratio of Yb3+ to ATP, Yb3+ was added to the solution of pyrocatechol violet (50μM) and ATP (50μM) in HEPES (10mM) buffer. The absorption peaks at 623nm (red line) begin to appear and at 444nm(blue line) weakened when [Yb3+]=100μM, and then, with the increase of [Yb3+], the former peak became larger while the later peak shrank and vanished finally.

**7. For the Detection of UTP, UDP and AMP**

**8. Reversibility of anion recognition**

The curves imply: we repeatly add Yb3+ into containing PV(50μM) HEPES buffer solution, UV/Vis spectrum can change back regularly. Furthermore, these prove the reversibility of anionrecognition.

Figure 8s. Blue line indicates the absorbance value changes at 444(nm) UV/Vis spectrum, red line indicate the absorbance value changes at 623(nm) UV/Vis spectrum.

1. **ΔA-Concentration Relations**

Figure 9s. (a) PV-Yb3+. In a pyrocatechol violet (50µM) solution, the value of ΔA changes with the addition of Yb3+ (final concentration:0-200µM), there is break point at [Yb3+]=100µM, which represents a coordination number of Yb3+ to pyrocatechol violet as 2:1.

Figure 9s. (b) Yb2(PV)-ATP. In the solution of Yb2(PV) (50μM), the value of ΔA changes with the addition of [ATP] (final concentration:0-200µM), there is break point at [ATP] =100µM, thus a coordination number of Yb3+ to ATP as 2:1 is obtained.

Figure 9s. (c) Yb2(PV)- HPO42-. In the Yb2(PV) (50μM) solution, the value of ΔA changes with the addition of HPO42-(final concentration is 0-200μM). There is break point at [HPO42-] =100µM, which shows a coordination number of Yb3+ to pyrocatechol violet as 1:1.
